# Supplementary material
Source: PubMed Central journal article supplement (PMC1308888)

a.

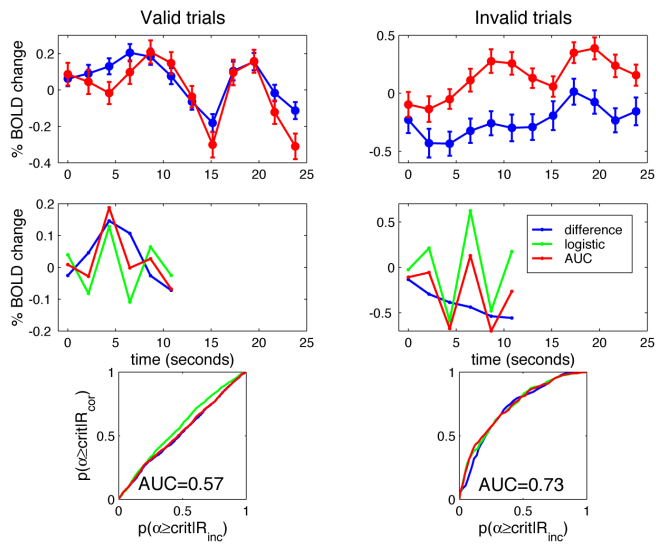

b.

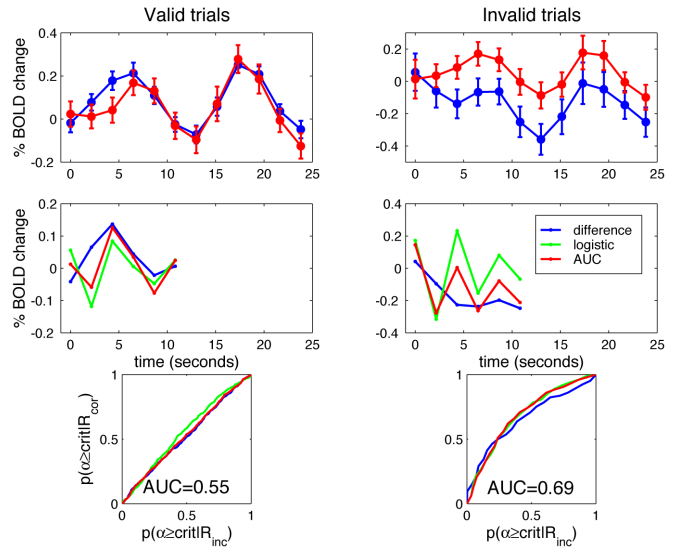

c.

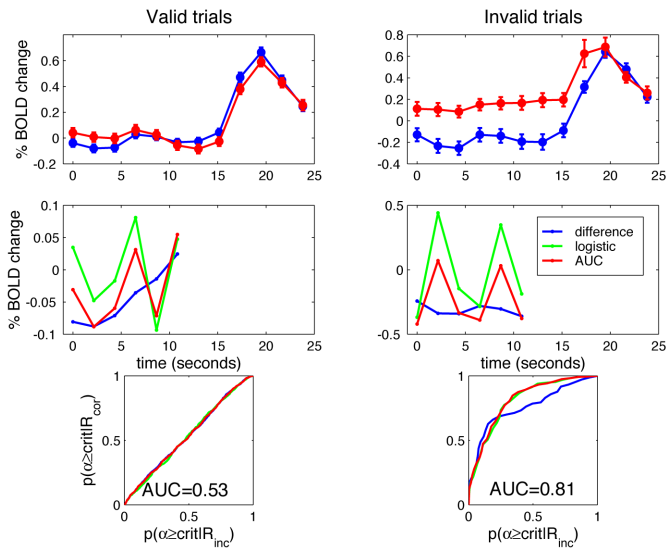

d.

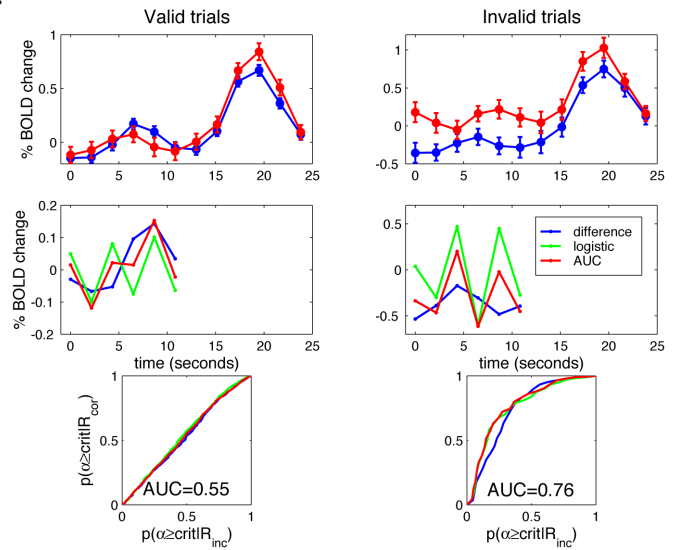

Supplement: pnas_0504678102_1.pdf [file pnas_0504678102_1.pdf]

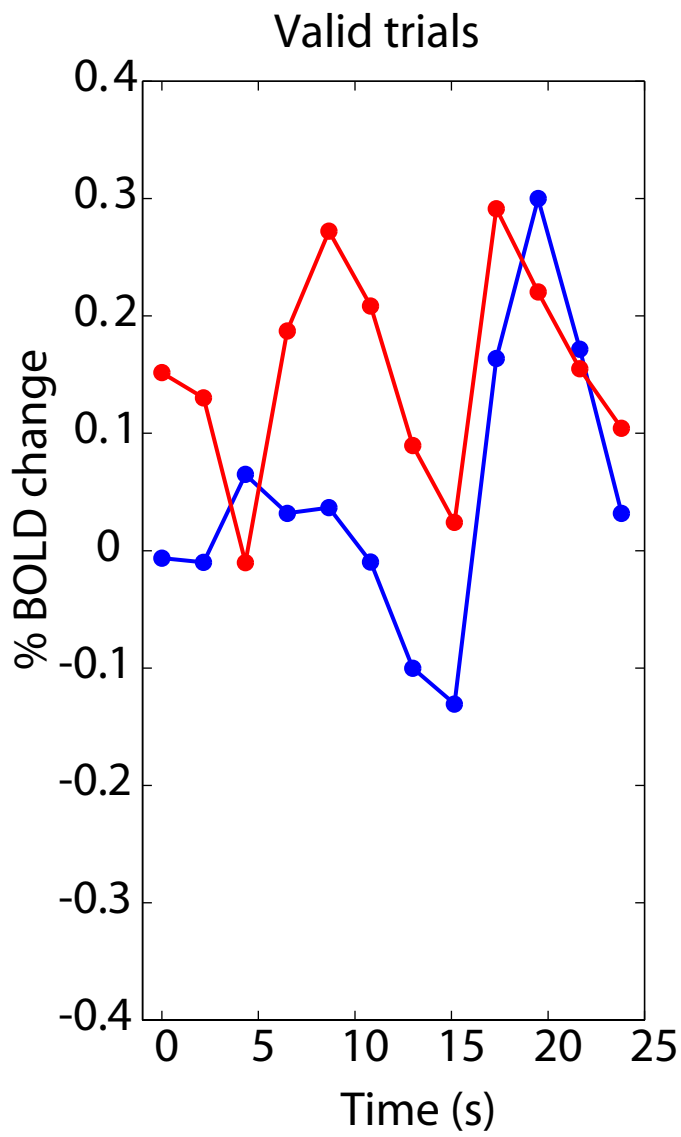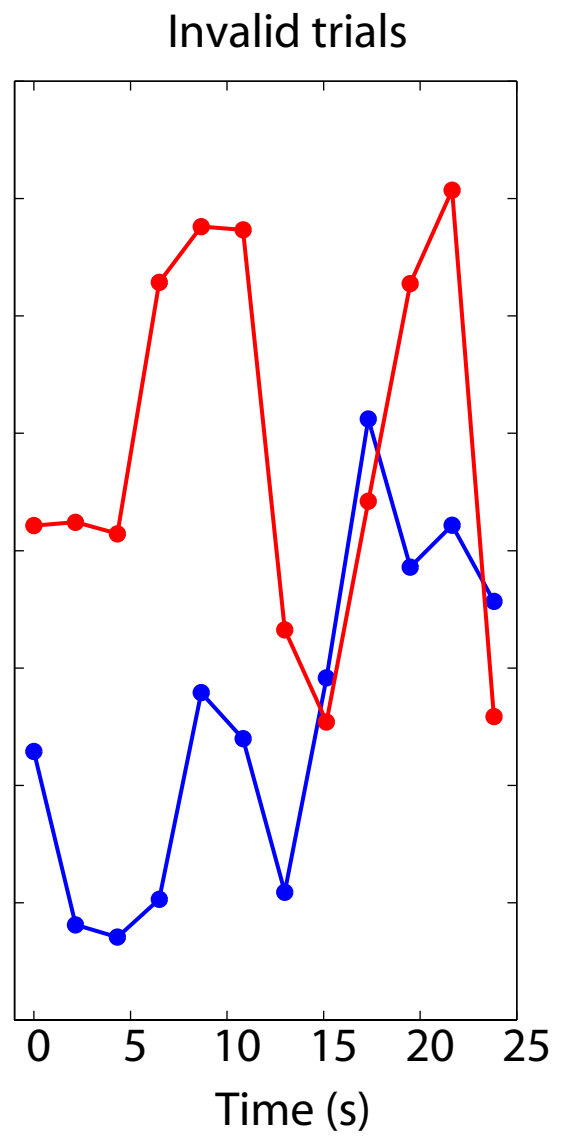

ventral orbito-frontal -24 29 -11

Supplement: pnas_0504678102_2.pdf [file pnas_0504678102_2.pdf]

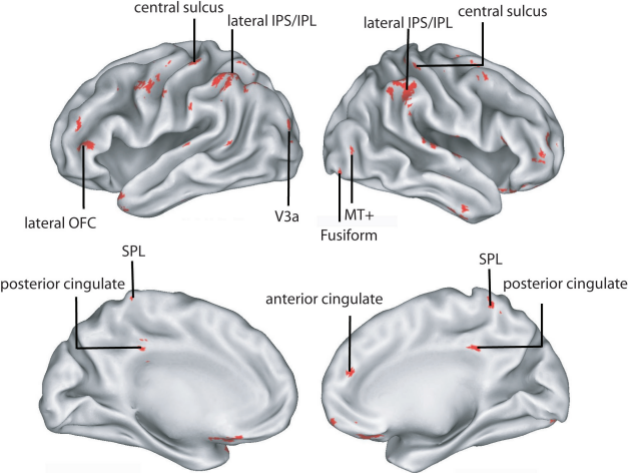

Supplement: pnas_0504678102_3.pdf [file pnas_0504678102_3.pdf]
